# Supplementary material
Source: publisher figshare collection journal article supplement (https://asha.figshare.com/articles/dataset/_/8204786)
Supplement: Supplementary file 1 [file 1]

## **Supplemental Material S1. Research assistant training protocol.**

When training research assistants, we provided discrete definitions of each phase to facilitate reliability and consistency in tracking behaviors:

(1) Before reading behaviors: referred to any behavior that occurred before subjects began reading the first paragraph of the chapter. Overt signals of this phase included scrolling to the end of the chapter and back to the beginning within a few seconds of opening the chapter, mouse hovering over learning objectives, etc.

(2) During reading behaviors: referred to any behavior that occurred once subjects began reading the chapter. Overt signals included behaviors such as pausing and scrolling through sections of a chapter before returning to their original reading position, note-taking, highlighting, etc.

(3) After reading behaviors: referred to any behavior that occurred once the subject read the last word of the chapter. Overt signals of this phase included scrolling back to the beginning of the chapter, reading over notes, etc.
