# Supplementary material
Source: publisher figshare collection journal article supplement (https://asha.figshare.com/articles/dataset/_/8204786)

## Supplemental Material S2. Visual guide.

This guide highlights the steps involved in matching coded behaviors to strategies.

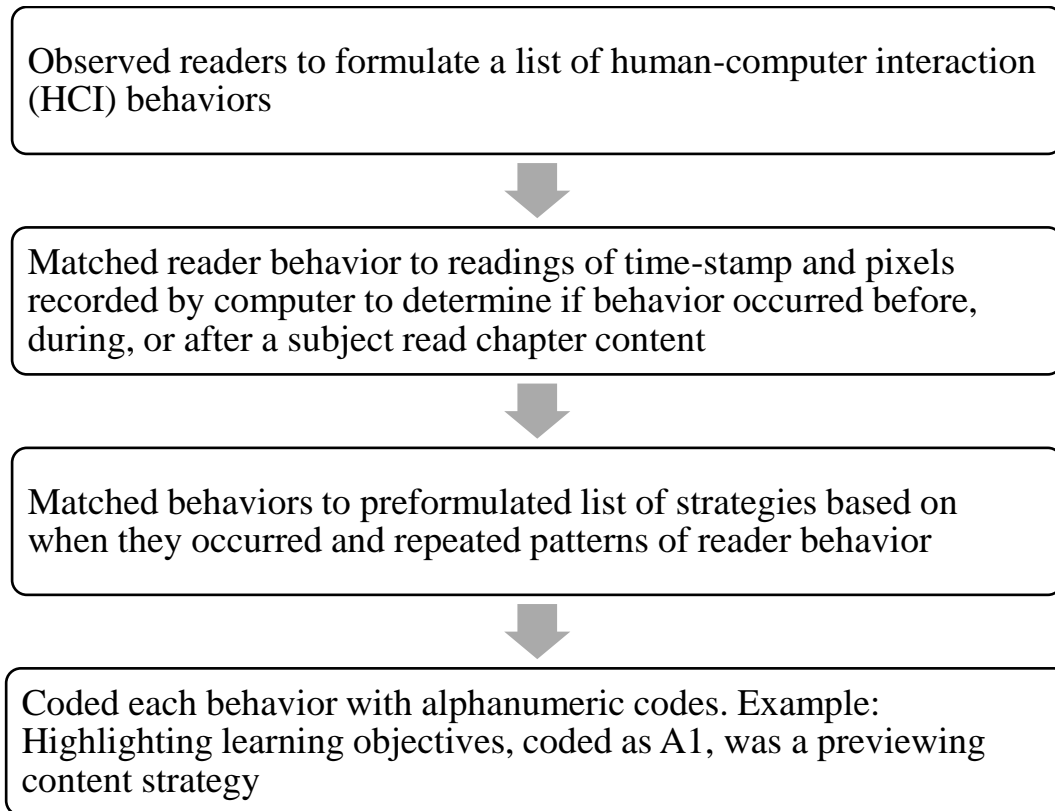

Supplement: Supplementary file 2 [file 1]
